# Supplementary material
Source: MDPI journal article supplement (https://www.mdpi.com/2073-4433/15/2/152)
Supplement: s1 [file s1 › atmosphere-2642831-supplementary.pdf]

# Assessing Nowcast Models in the Central Mexico Region Using Radar and GOES-16 Satellite Data

Diana Islas-Flores <sup>1,\*</sup> and Adolfo Magaldi <sup>2</sup>

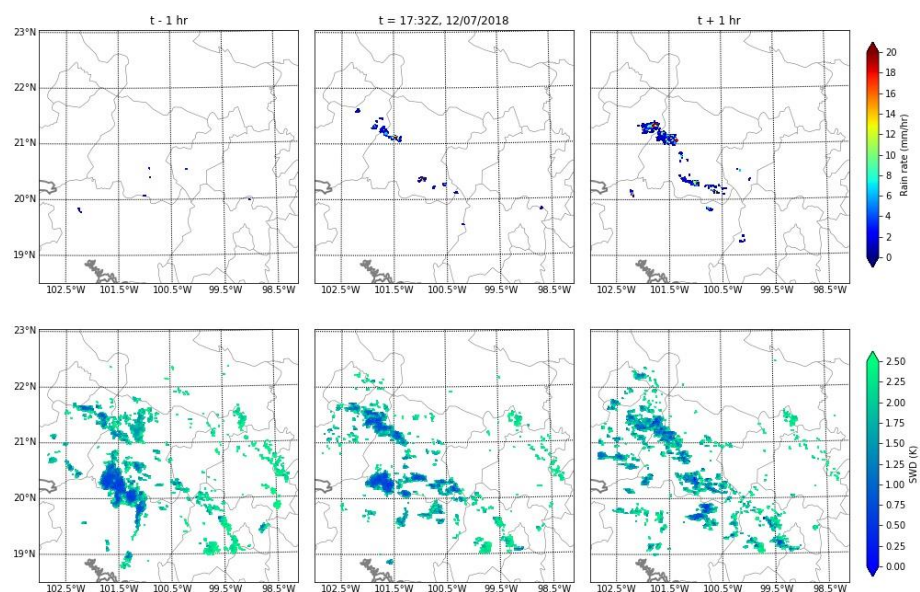

Event starting at 17:32Z, 12/07/2018.

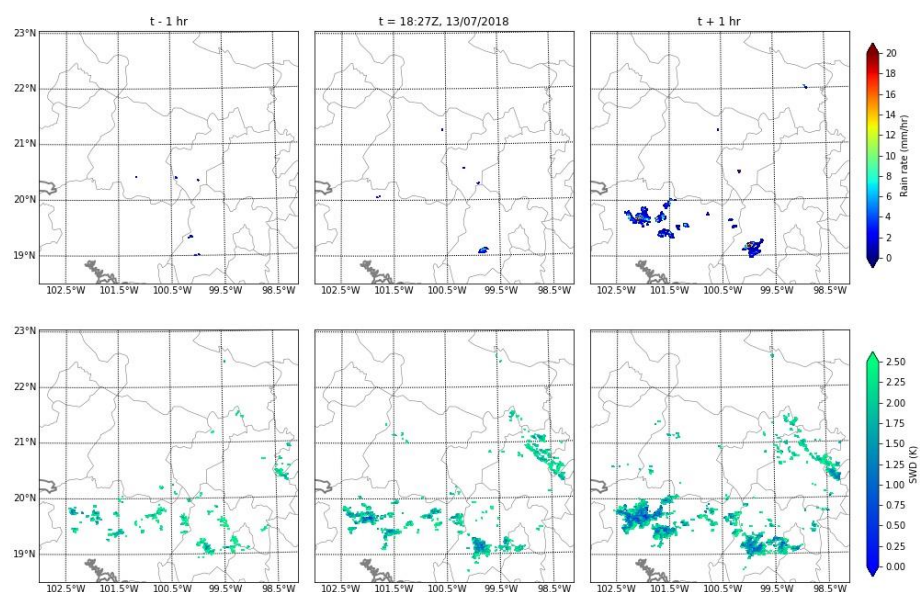

Event starting at 18:27Z, 13/07/2018.

---

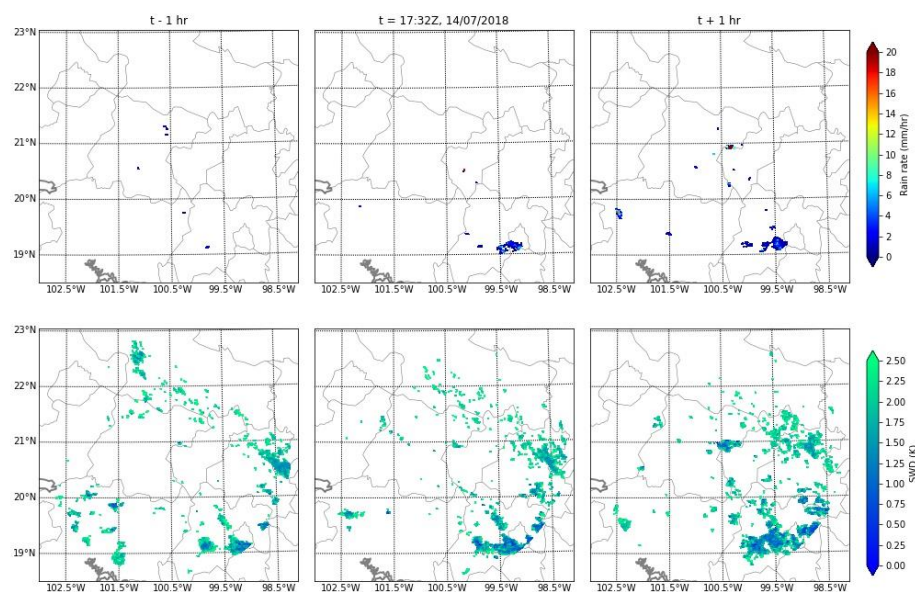

Event starting at 17:32Z, 14/07/2018.

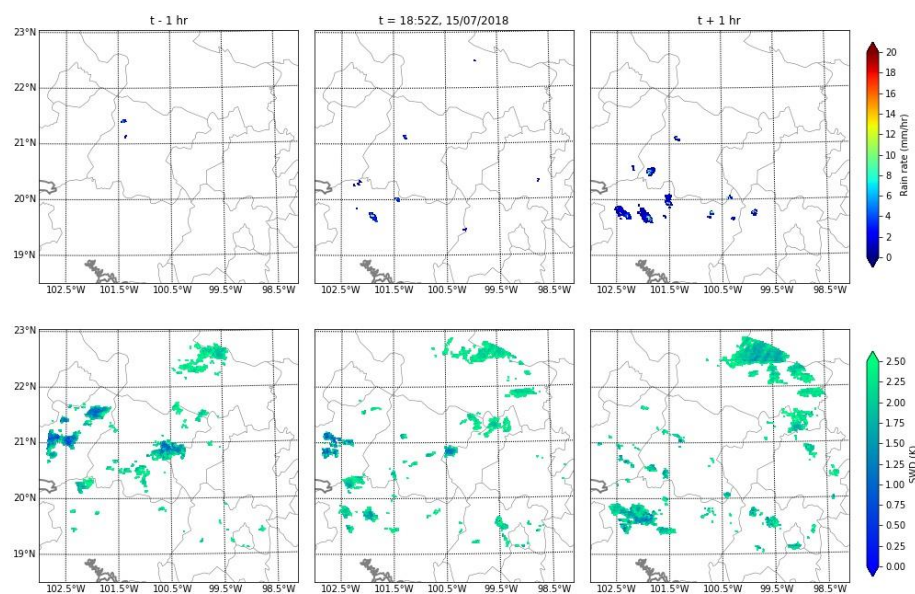

Event starting at 18:52Z, 15/07/2018.

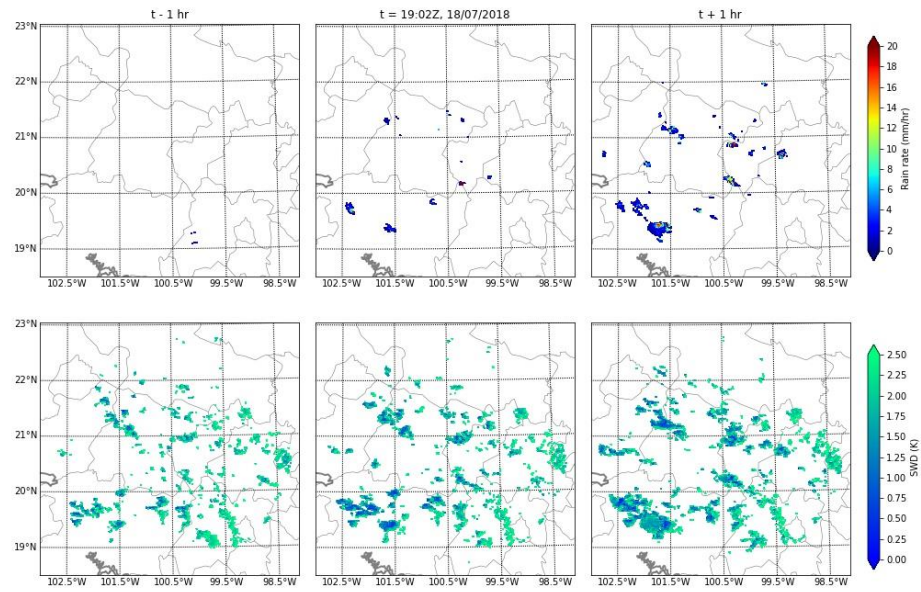

Event starting at 19:02Z, 18/07/2018.

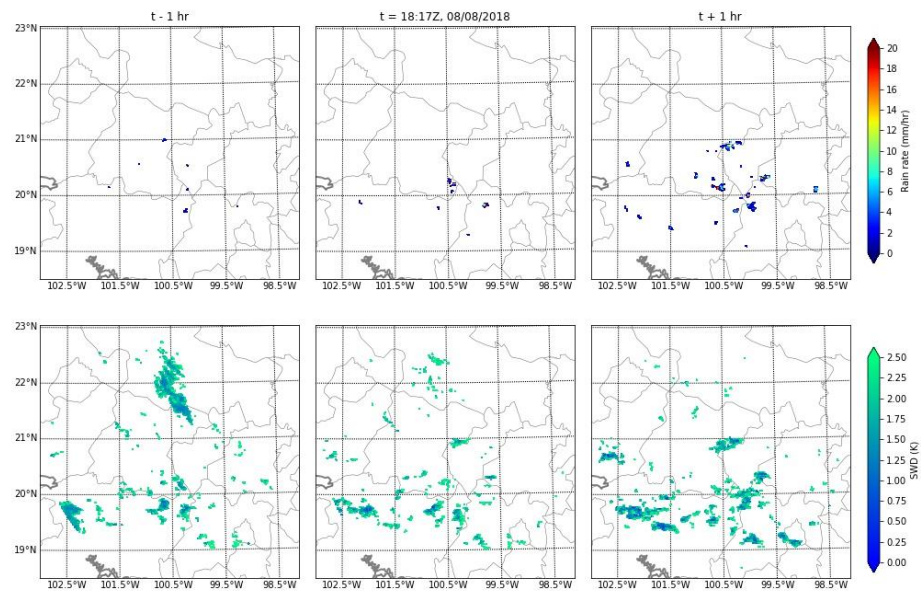

Event starting at 18:17Z, 08/08/2018.

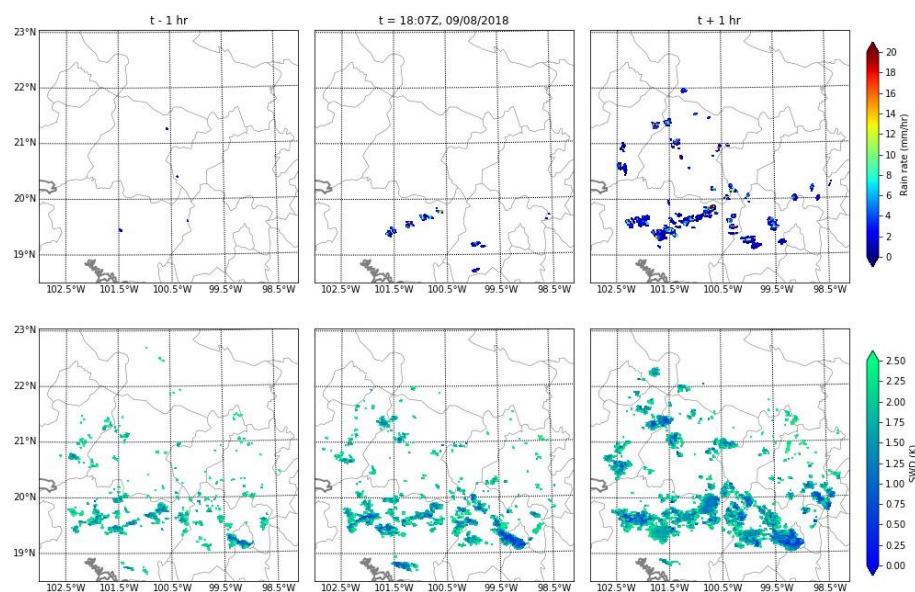

Event starting at 18:07Z, 09/08/2018.

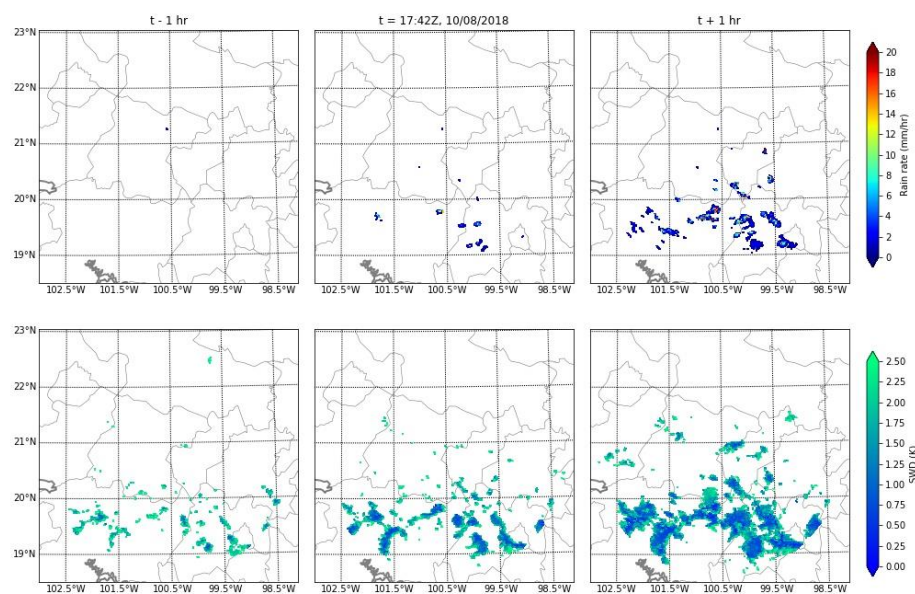

Event starting at 17:42Z, 10/08/2018.

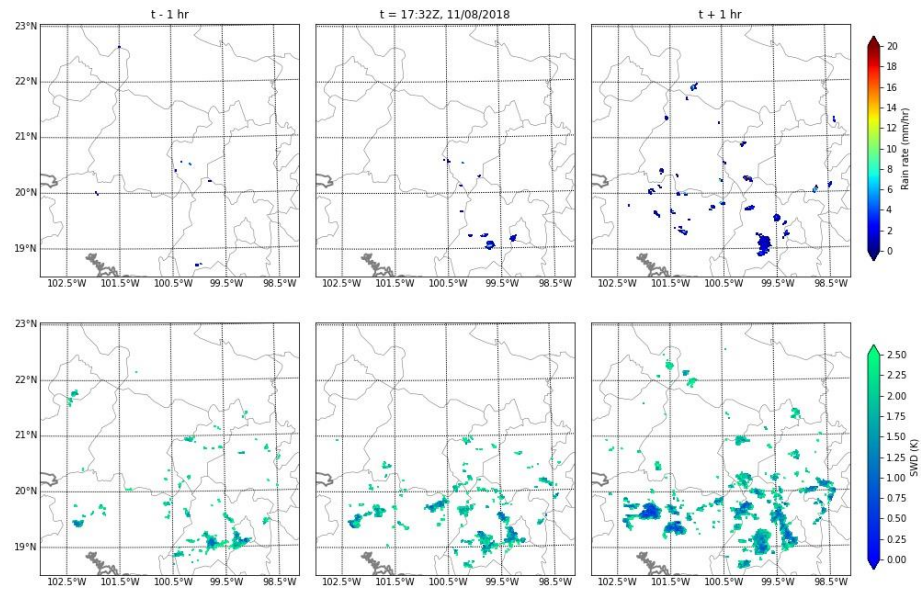

Event starting at 17:32Z, 11/08/2018.

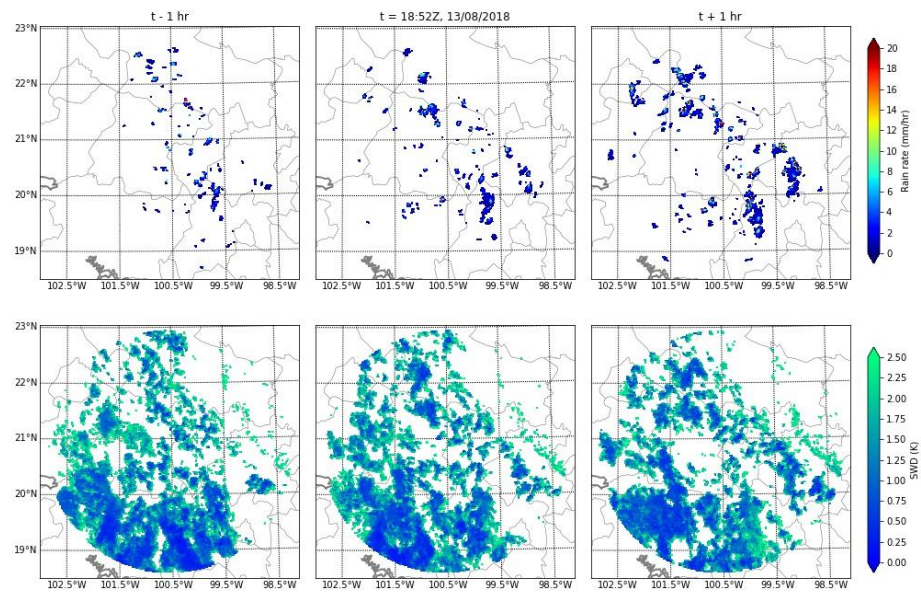

Event starting at 18:52Z, 13/08/2018.

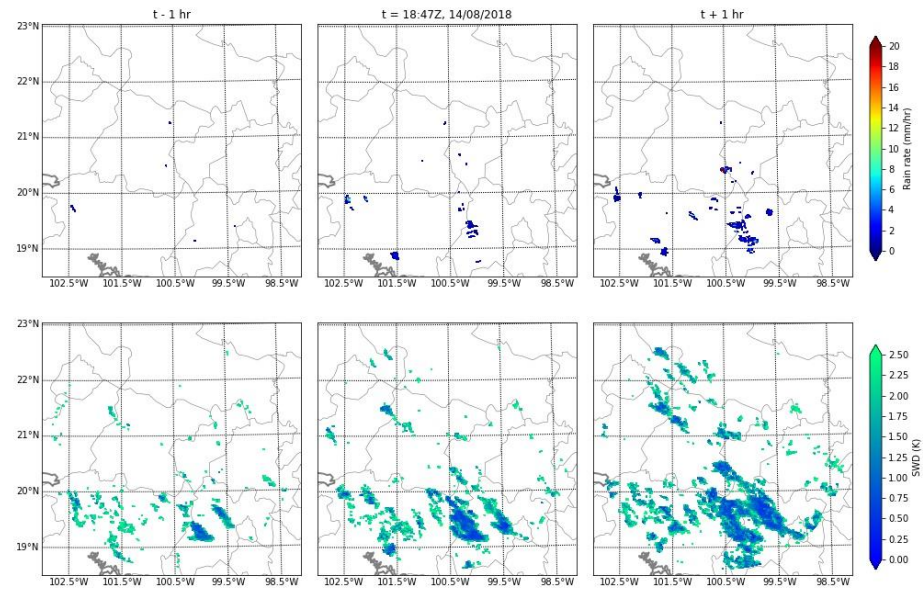

Event starting at 18:47Z, 14/08/2018.

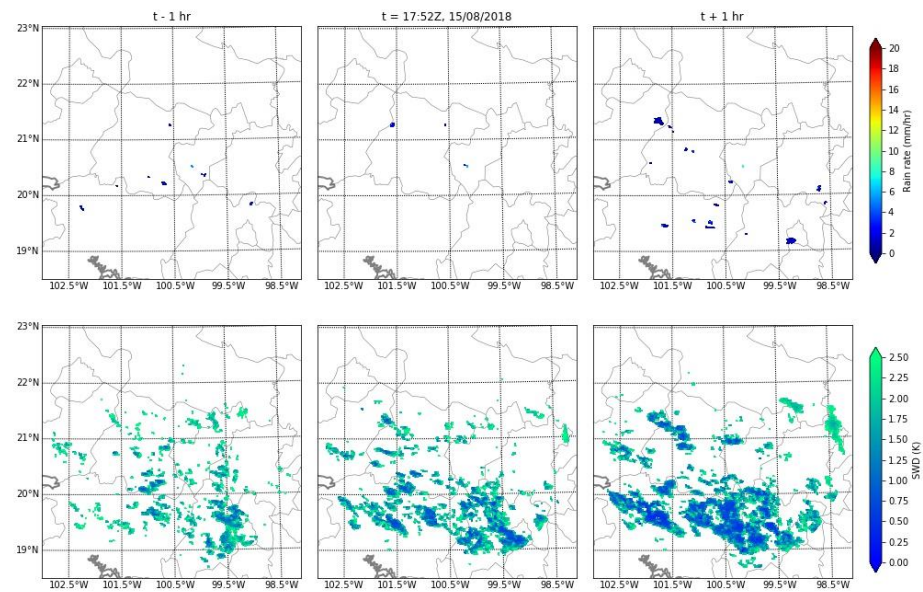

Event starting at 17:52Z, 15/08/2018.

**Figure S1.** Rain rate from the Queretaro radar (top images) and SWD field below 2.5 K from the GOES-16 satellite (bottom images) for 12 events. Images present 1 hour before start of the event (left images), at the start of the event (middle images) and 1 hour after start of the events (right images).
